# Supplementary material for: Towards a new packing pattern of Li adsorption in two-dimensional pentagonal BCN
Source: Royal Society of Chemistry journal article supplement (doi:10.1039/d2cp00280a), 2022-01-01
Supplement: d2cp00280a1.pdf [file d2cp00280a1.pdf]

## Supplementary information for

# Towards a new packing pattern of Li adsorption in two-dimensional pentagonal BCN†

*Aroon Ananchuensook,<sup>a</sup> Klichchupong Dabsamut,<sup>a,b</sup> Thanasee Thanasarnsurapong,<sup>a</sup> Tosapol Maluangnont,<sup>c,d</sup> Jiraroj T-Thienprasert,<sup>a,e</sup> Sirichok Jungthawan,<sup>e,f</sup> and Adisak Boonchun,<sup>a,e,\*</sup>*

<sup>a</sup> Department of Physics, Faculty of Science, Kasetsart University, Bangkok 10900, Thailand

<sup>b</sup> Department of Physics, Case Western Reserve University, 10900 Euclid Avenue, Cleveland, Ohio 44106-7079, USA

<sup>c</sup> Electroceramics Research Laboratory, College of Materials Innovation and Technology, King Mongkut's Institute of Technology Ladkrabang, Bangkok 10520, Thailand

<sup>d</sup> Catalytic Chemistry Research Unit, School of Science, King Mongkut's Institute of Technology Ladkrabang, Bangkok 10520, Thailand

<sup>e</sup> Thailand Center of Excellence in Physics, Commission on the Higher Education, 328 Si Ayutthaya Road, Bangkok 10400, Thailand

<sup>f</sup> School of Physics, Institute of Science, and Center of Excellence in Advanced Functional Materials, Suranaree University of Technology, Nakhon Ratchasima, 30000, Thailand

**TABLE S1.** Adsorption Energies ( $E_{ad}$  in eV), Adsorption Height ( $h$  in Å) of Single Li-Adsorbed Penta-BCN

| Site | $E_{ad}^{Li}$ | $h^{Li}$ (Å) |
|------|---------------|--------------|
| ①    | 0.05          | 2.26         |
| ②    | 0.06          | 2.30         |
| ③    | 0.81          | 2.85         |
| ④    | -0.14         | 1.87         |
| ⑤    | 0.33          | 2.62         |
| ⑥    | -0.20         | 1.87         |
| ①    | 0.13          | 2.38         |
| ②    | -0.03         | 2.08         |
| ③    | 0.68          | 2.55         |
| ④    | 0.12          | 2.18         |
| ⑤    | 0.14          | 2.38         |
| ⑥    | 0.07          | 2.17         |
| ⑦    | 0.65          | 2.55         |
| ⑧    | -0.01         | 2.14         |
| ⑨    | 0.54          | 2.74         |
| ⑩    | -0.15         | 1.74         |
| ①    | 0.69          | 2.61         |
| ②    | 0.39          | 2.38         |
| ③    | 0.12          | 2.25         |
| ④    | 0.40          | 2.42         |
| ◇    | -0.24         | 1.82         |

**TABLE S2.** The compared structures of  $\text{Li}_x\text{BCN}$  of this works and Chen's model with side and top views

| Composition                  | This work                                                                           |                                                                                     | Chen's model                                                                         |                                                                                       |
|------------------------------|-------------------------------------------------------------------------------------|-------------------------------------------------------------------------------------|--------------------------------------------------------------------------------------|---------------------------------------------------------------------------------------|
|                              | Side view                                                                           | Top view                                                                            | Side view                                                                            | Top view                                                                              |
| $\text{Li}_{0.50}\text{BCN}$ | 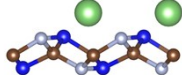   | <br>Note: Li slightly shifted from on top position (M-site)                         | 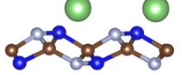   | <br>Note: Li is exactly on top position (N2-site)                                     |
| $\text{Li}_{1.25}\text{BCN}$ | 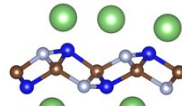   | 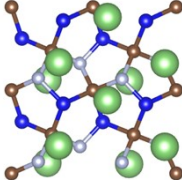   | 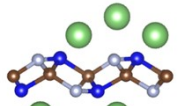   | 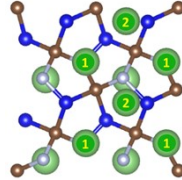   |
| $\text{Li}_{1.50}\text{BCN}$ | 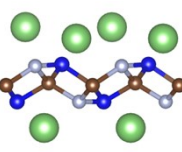  | 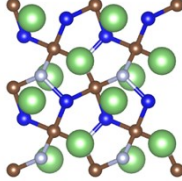  | 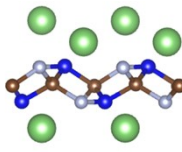  | 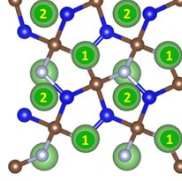  |
| $\text{Li}_{1.75}\text{BCN}$ | 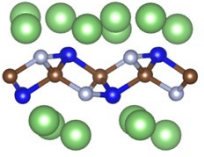 | 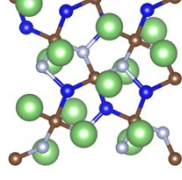 | 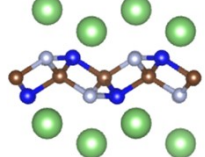 | 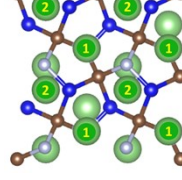 |
| $\text{Li}_{2.00}\text{BCN}$ | 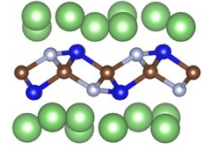 | 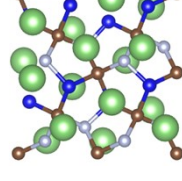 | 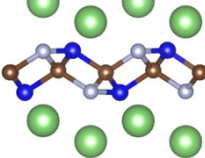 | 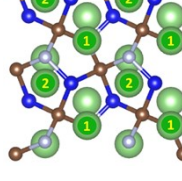 |
